# Supplementary material for: Optogenetic Tuning Reveals Rho Amplification-Dependent Dynamics of a Cell Contraction Signal Network
Source: PubMed Central journal article supplement (PMC7710677; doi:10.1016/j.celrep.2020.108467), 2020-12-01
Supplement: mmc1.pdf [file mmc1.pdf]

**Cell Reports, Volume 33**

**Supplemental Information**

**Optogenetic Tuning Reveals Rho  
Amplification-Dependent Dynamics  
of a Cell Contraction Signal Network**

**Dominic Kamps, Johannes Koch, Victor O. Juma, Eduard Campillo-Funollet, Melanie Graessl, Soumya Banerjee, Tomáš Mazel, Xi Chen, Yao-Wen Wu, Stephanie Portet, Anotida Madzvamuse, Perihan Nalbant, and Leif Dehmelt**

# Supplemental Information

## Supplemental Figures:

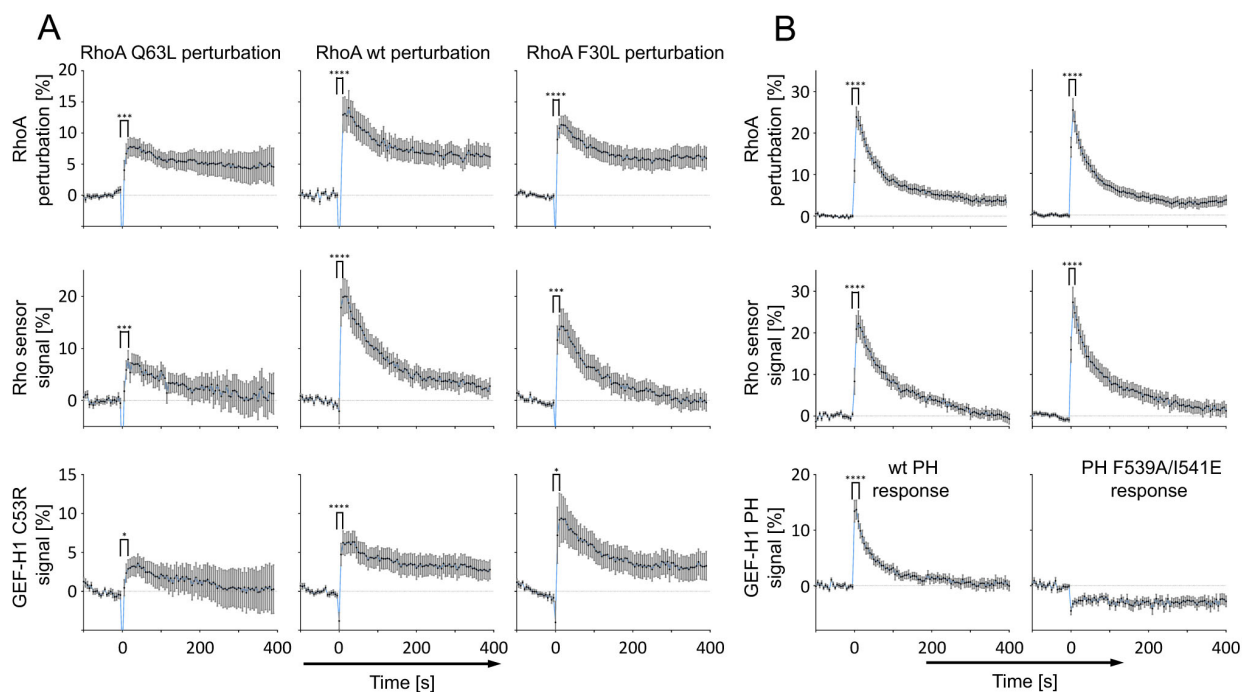

**Supplemental Figure 1 (related to Figure 1): Direct investigation of Rho-dependent GEF-H1 plasma membrane recruitment. A:** Quantification of the RhoA plasma membrane recruitment and Rho activity sensor/GEF-H1 co-recruitment. **B:** Quantification of GEF-H1 PH domain co-recruitment with active RhoA Q63L. F539A/I541E: PH domain mutant that is deficient in its interaction with active Rho. (A-B: % increase above average intensity before photoactivation at  $t=0$ s with standard error of the mean (SEM);  $n \geq 14$  (A) or  $n \geq 21$  (B) cells from three experiments; \*\*\*\*,  $P \leq 0.0001$ ; \*\*\*,  $P \leq 0.001$ ; \*\*,  $P \leq 0.01$ ; \*,  $P \leq 0.05$ ; paired t test before and 10 s after photoactivation);

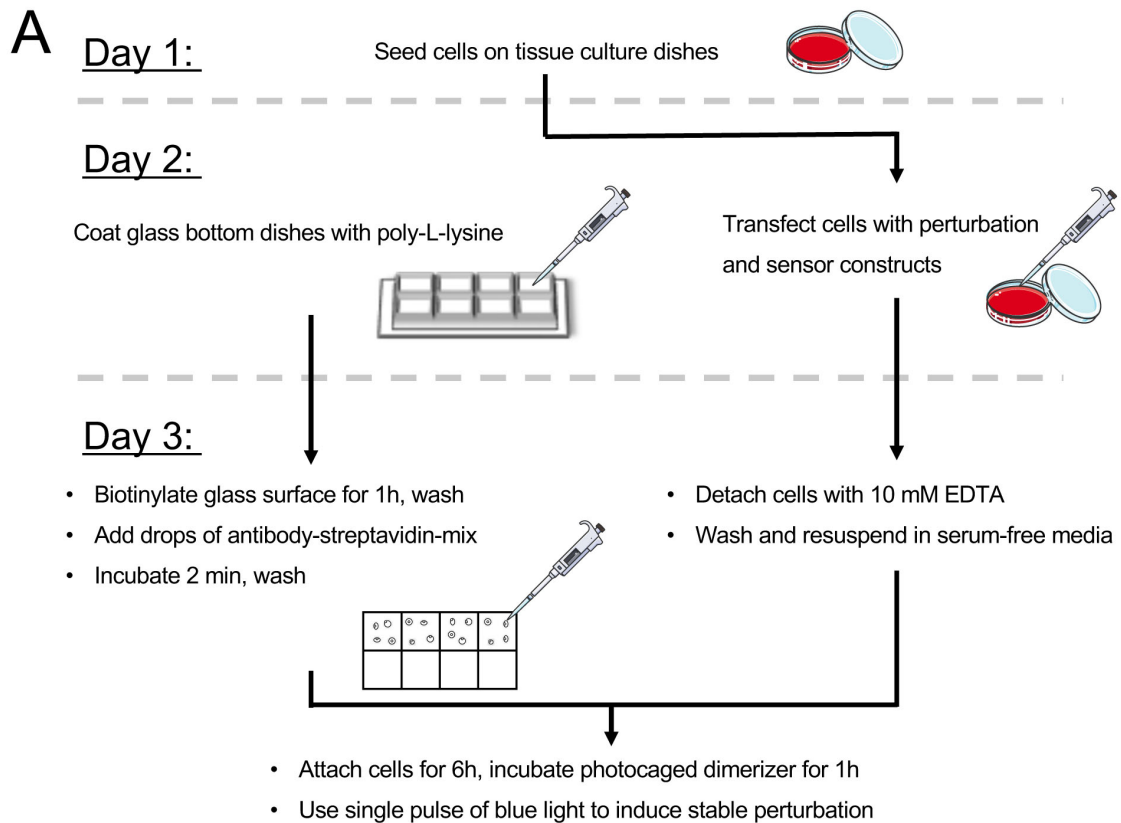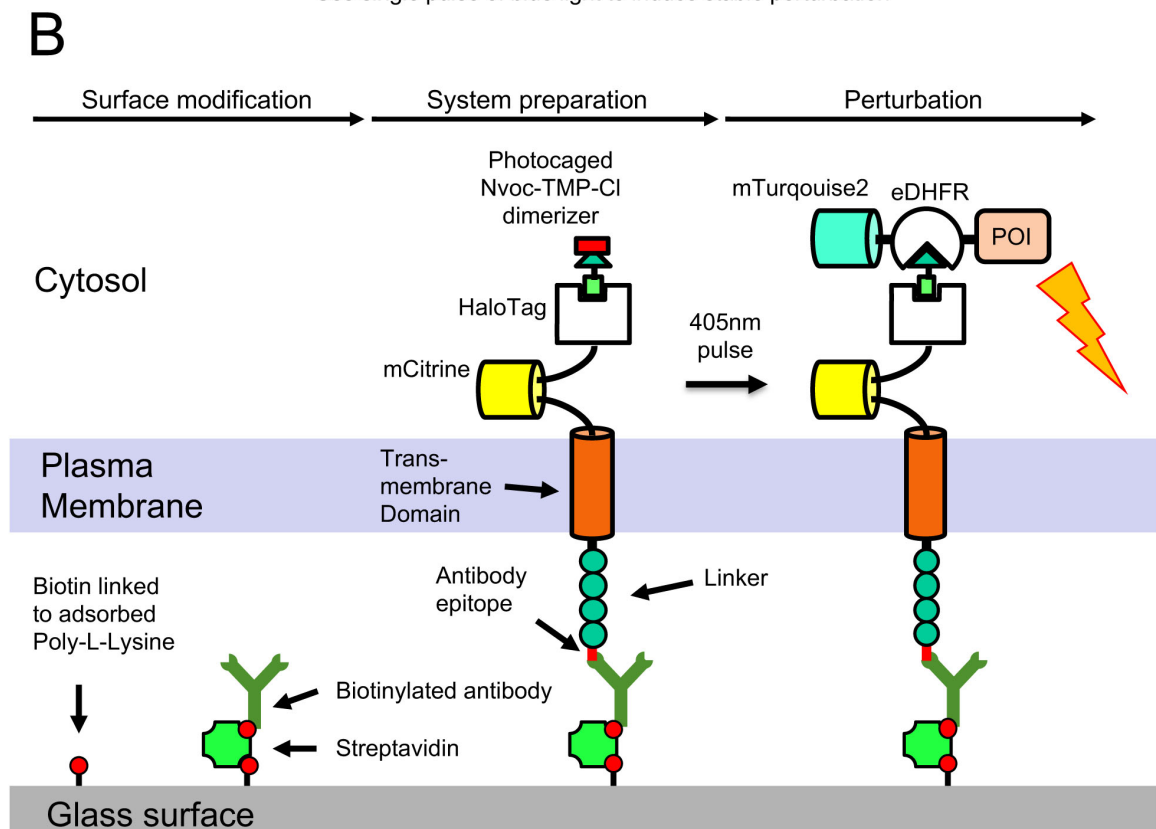

**Supplemental Figure 2 (related to Figure 2): Schematic summary of improved “Molecular Activity Painting” technique to acutely introduce stable perturbations at the plasma membrane of living cells. A: Experimental workflow and time considerations. B: Schematics for step-wise construction of perturbation system. This figure was created using Servier Medical Art templates, which are licensed under a Creative Commons Attribution 3.0 Unported License; <https://smart.servier.com>**

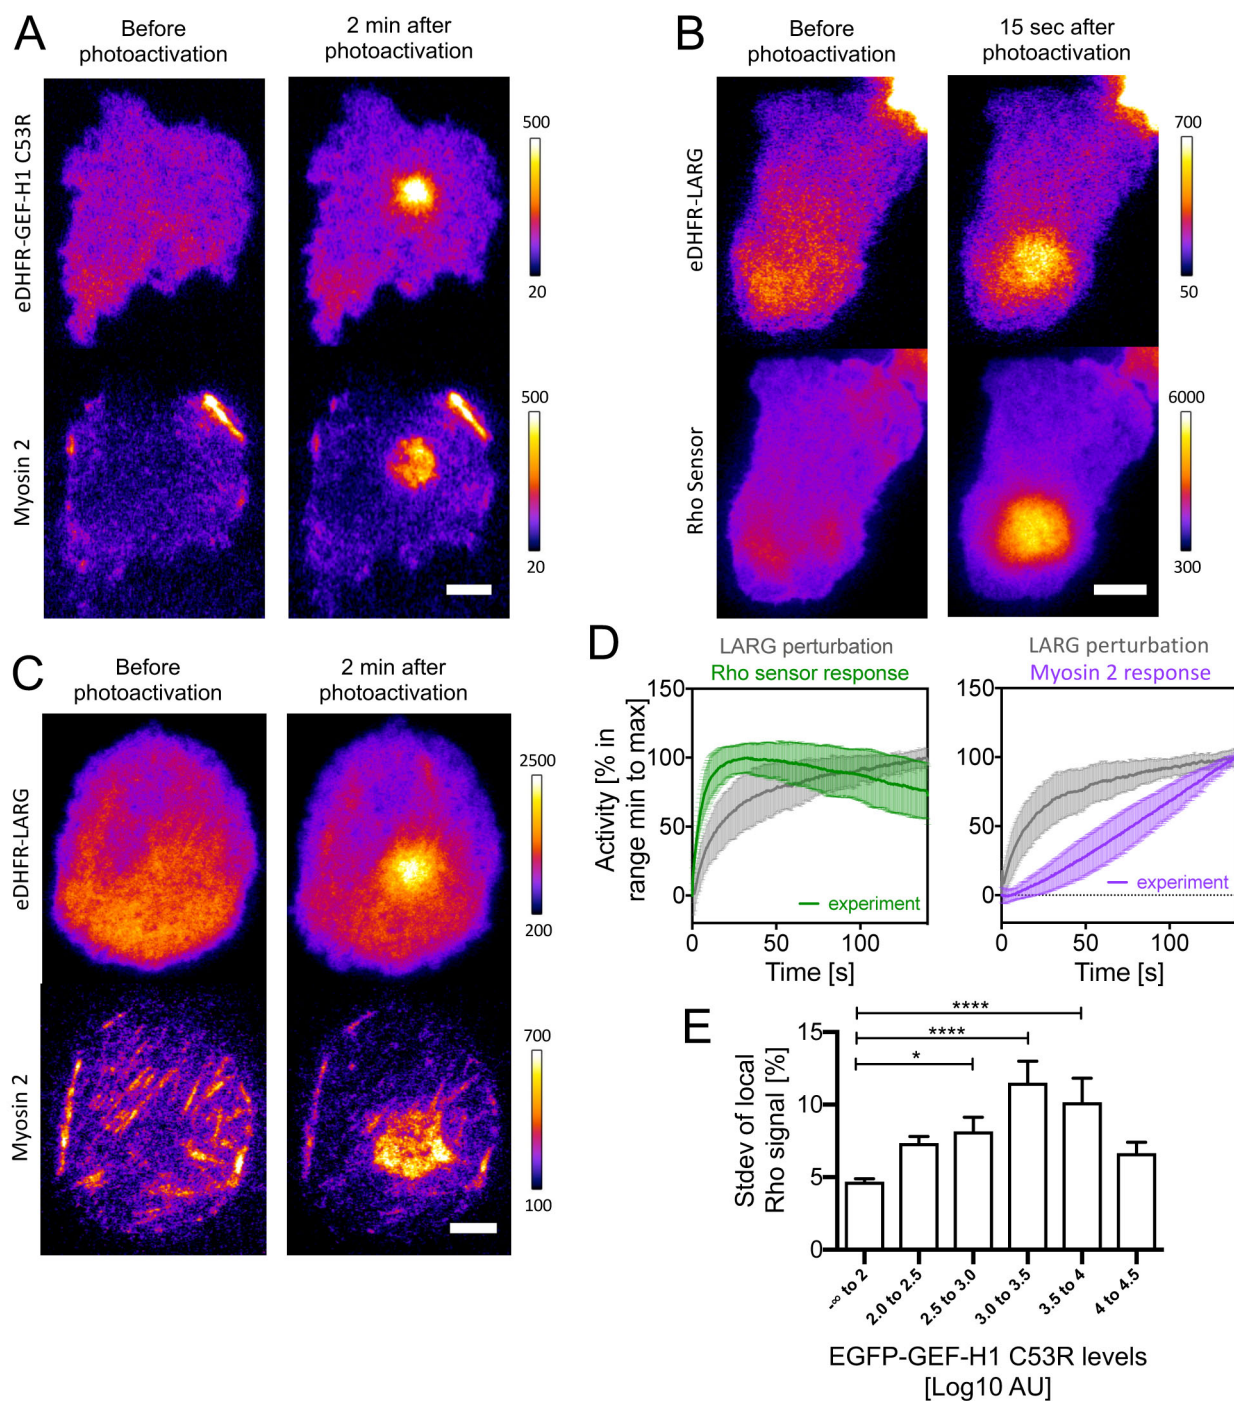

**Supplemental Figure 3 (related to Figure 2): Rho activity and myosin cell cortex recruitment response to Lbc-type GEF perturbation.** **A:** TIRF images of immobilized GEF-H1 C53R perturbation and Myosin response (see also Video 2). **B-C:** TIRF images of immobilized LARG perturbation and Rho activity sensor (**B**) or Myosin (**C**) response (see also Video 2). **D:** Kinetics of Rho activity sensor and Myosin cell cortex recruitment response to acute chemo-optogenetic LARG perturbations ( $n \geq 23$  cells from three experiments, mean with SEM). **E:** Dependence of Rho activity dynamics on the effective cytosolic concentration of GEF-H1 C53R. Activity dynamics were measured by determining the standard deviation of the local Rho activity sensor signal ( $n=124$  cells from three experiments; mean and SEM; One way ANOVA, Dunnett's post test, \*:  $P < 0.05$ , \*\*\*\*:  $P < 0.0001$ ). % indicates percentage of mean intensity. Scale bars:  $10\mu\text{m}$ .



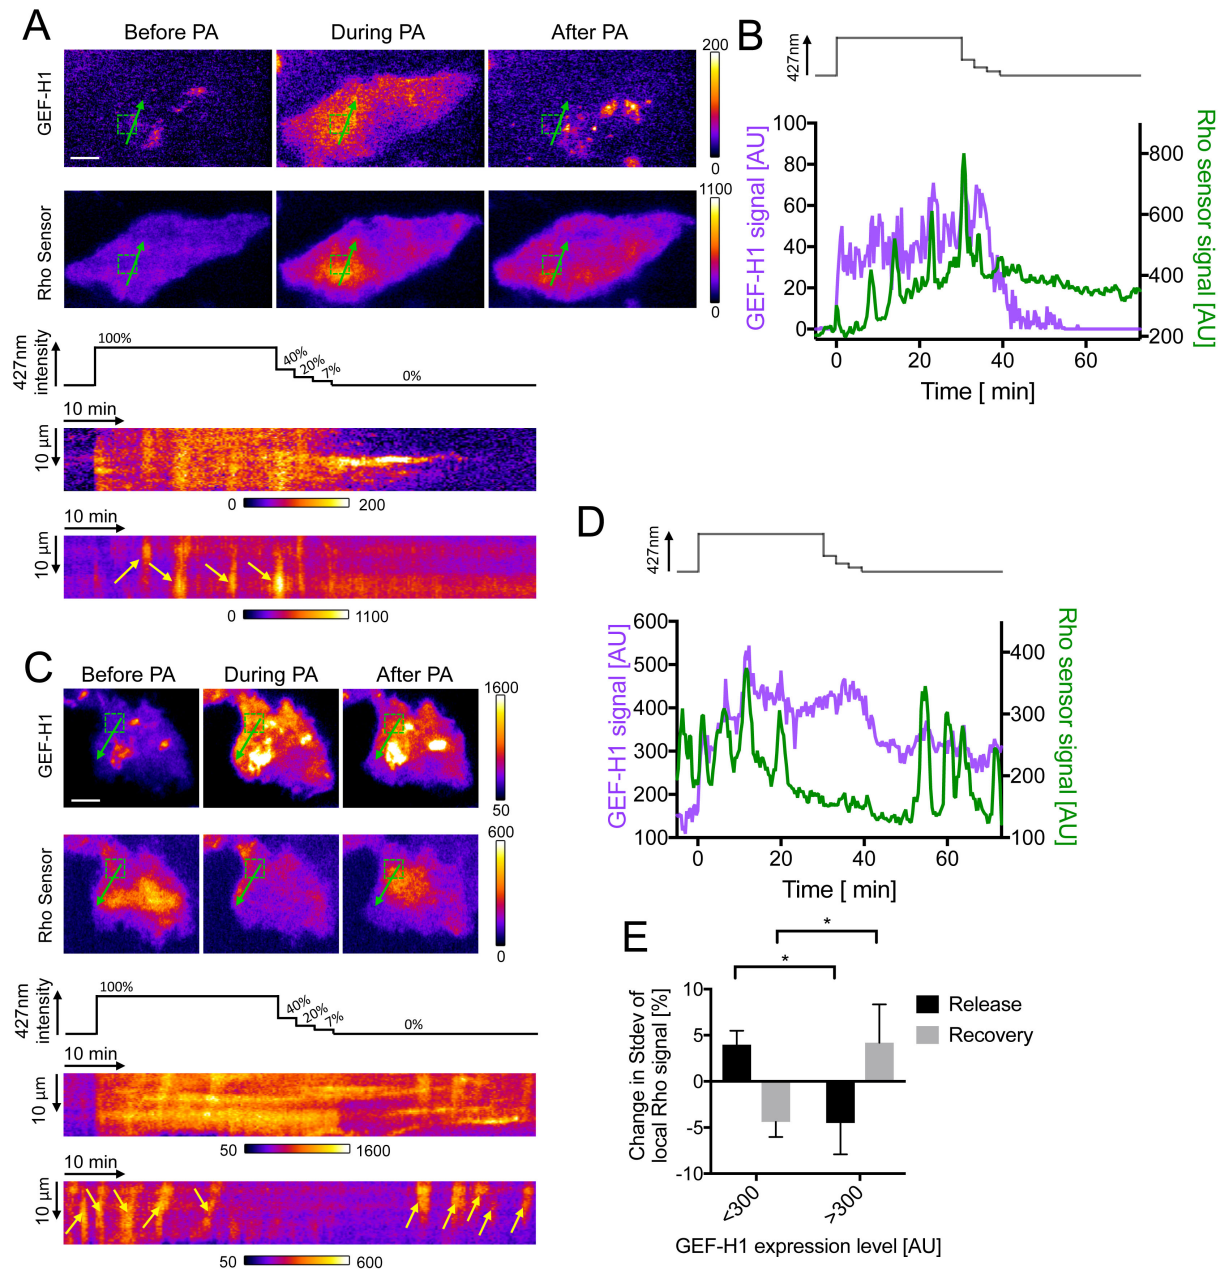

**Supplemental Figure 4 (related to Figure 3): GEF-H1 concentration-dependent switching of Rho activity dynamics by reversible optogenetic tuning.** **A-D:** Analysis of two representative cells that demonstrate either reversible activation (**A,B**) or reversible saturation (**C,D**) of Rho activity dynamics during subsequent increase and decrease of the effective cytosolic concentration of GEF-H1 via photoactivation (PA) of the LOVTRAP system. **A,C:** Top: TIRF images of mCherry-Zdk1-GEF-H1(C53R) and the Rho sensor (see also Video 5). Bottom: Kymographs corresponding to green arrows in top panel. Yellow arrows point to Rho activity pulses or Rho activity waves. **B,D:** Cytosolic mCherry-Zdk1-GEF-H1(C53R) levels obtained as the minimum signal in green boxed regions in **A** or **C**, and measurements of the Rho activity sensor signal over the time course of the experiment. **E:** Local standard deviation of Rho activity signals at low (<300) or high (>300) levels of mCherry-Zdk1-GEF-H1(C53R) from all analyzed cells ( $n = 16$  cells from three experiments, mean and SEM; unpaired t-test, \*:  $P < 0.05$ ). Columns represent the change of the average local standard deviation of Rho activity signals induced by the release of GEF-H1 from mitochondria (comparing the time ranges -5 to 0 min before PA with 25 – 30 min during PA) or induced by the recovery of GEF-H1 to mitochondria (comparing the time ranges 25 – 30 min during PA with 25 – 30 min after PA). % indicates percentage of mean intensity. PA: photoactivation. Scale bars: 10 $\mu$ m.

## Supplemental tables

| Experimental measurement                                                            | Measured values                                                                                                               |
|-------------------------------------------------------------------------------------|-------------------------------------------------------------------------------------------------------------------------------|
| GEF-H1 perturbation rate constant (mono-exponential fit to grey curve in Figure 2D) | 0.0789 +/- 0.006 s <sup>-1</sup> (with Rho sensor; left panel)<br>0.0397 +/- 0.009 s <sup>-1</sup> (with Myosin; right panel) |
| Rho and Myosin response kinetics                                                    | Simulations were fitted to all time points shown in Figure 2D                                                                 |
| Period of Rho activity pulses                                                       | 248 +/- 95 s (n=10 cells; in the presence of active GEF-H1 C53R, this work)                                                   |
| Time shift Myosin after Rho                                                         | 39.5 +/- 14.7 s (n=37 cells; Graessl et al.)                                                                                  |
| Time shift Rho after GEF-H1                                                         | 2.5 +/- 5.6 s (n=68 cells; Graessl et al.)                                                                                    |

**Supplemental Table 1: Experimental data used to parameterize the ODE system (related to Figure 2).** The ODE system is given in Eq.(1-3).

| Parameter                                                  | Lower bound<br>for fitting | Upper bound for<br>fitting |
|------------------------------------------------------------|----------------------------|----------------------------|
| Concentrations                                             |                            |                            |
| in $10^6$ molecules/cell:                                  |                            |                            |
| $G_T$ (oscillatory regime)                                 | 0.142                      | 20                         |
| $G_T$ (perturbation/Rho response)                          | 0.0142                     | 1                          |
| $G_T$ (perturbation/Myosin response)                       | 0.0142                     | 1                          |
| $R_T$ (all regimes; fixed value based on <sup>12</sup> )   | 0.443                      | 0.443                      |
| $M_T$ (all regimes; fixed value based on <sup>12</sup> )   | 1.24                       | 1.24                       |
| Rate constants:                                            |                            |                            |
| $k_1/K_{m1}$ in $s^{-1}(10^6 \text{ molecules/cell})^{-2}$ | 0.316                      | 31.6                       |
| $k_2/K_{m2}$ in $s^{-1}(10^6 \text{ molecules/cell})^{-1}$ | 0.15                       | 150                        |
| $k_3$ in $s^{-1}(10^6 \text{ molecules/cell})^{-2}$        | 0.15                       | 15                         |
| $k_4$ in $s^{-1}(10^6 \text{ molecules/cell})^{-2}$        | 0.015                      | 15                         |
| $k_5/K_{m5}$ in $s^{-1}(10^6 \text{ molecules/cell})^{-2}$ | 0.005                      | 5.00                       |
| $k_6/K_{m6}$ in $s^{-1}(10^6 \text{ molecules/cell})^{-1}$ | 0.000844                   | 2.67                       |
| Michaelis constants                                        |                            |                            |
| in $10^6$ molecules/cell:                                  |                            |                            |
| $K_{m1}$                                                   | 0.0475                     | 47.5                       |
| $K_{m2}$                                                   | 0.01                       | 10                         |
| $K_{m5}$                                                   | 0.003                      | 3.00                       |
| $K_{m6}$                                                   | 0.0563                     | 5.63                       |

**Supplemental Table 2: Parameters of the ODE system and their prior distributions for fitting to experimental data (related to Figure 2).** The ODE system is given by Eq.(1-3). The distributions are defined by the given ranges with equal probability.

| Physical parameter                                                      | Estimated value (mode of distribution) | 95% lower bound | 95% upper bound |
|-------------------------------------------------------------------------|----------------------------------------|-----------------|-----------------|
| Total concentrations<br>in $10^6$ molecules/cell:                       |                                        |                 |                 |
| GEF-H1 ( $G_T$ );<br>oscillatory regime                                 | 0.179                                  | 0.178           | 4.64            |
| GEF-H1 ( $G_T$ );<br>perturbation regime;<br>Rho response               | 0.0858                                 | 0.0491          | 0.175           |
| GEF-H1 ( $G_T$ );<br>perturbation regime;<br>Myosin response            | 0.233                                  | 0.0203          | 0.234           |
| Rho ( $R_T$ ); all<br>regimes; fixed value<br>based on <sup>12</sup>    | 0.443                                  |                 |                 |
| Myosin ( $M_T$ ); all<br>regimes; fixed value<br>based on <sup>12</sup> | 1.24                                   |                 |                 |
| Rate constants:                                                         |                                        |                 |                 |
| $k_1/K_{m1}$ in $s^{-1}(10^6$<br>molecules/cell) <sup>-1</sup>          | 3.88                                   | 1.09            | 5.37            |
| $k_2/K_{m2}$ in $s^{-1}$                                                | 2.04                                   | 0.880           | 3.83            |
| $k_3$ in $s^{-1}(10^6$<br>molecules/cell) <sup>-1</sup>                 | 1.19                                   | 0.723           | 3.34            |
| $k_4$ in $s^{-1}(10^6$<br>molecules/cell) <sup>-1</sup>                 | 3.98                                   | 3.97            | 14.9            |
| $k_5/K_{m5}$ in $s^{-1}(10^6$<br>molecules/cell) <sup>-1</sup>          | 0.417                                  | 0.074           | 0.718           |
| $k_6/K_{m6}$ in $s^{-1}$                                                | 0.00509                                | 0.000904        | 0.00510         |
| Michaelis constants<br>in $10^6$ molecules/cell:                        |                                        |                 |                 |
| $K_{m1}$                                                                | 2.42                                   | 0.0886          | 2.43            |
| $K_{m2}$                                                                | 0.0745                                 | 0.0741          | 0.564           |
| $K_{m5}$                                                                | 0.014                                  | 0.00733         | 0.0658          |
| $K_{m6}$                                                                | 0.786                                  | 0.258           | 1.83            |

**Supplemental Table 3: Parameters of the ODE system and their estimations obtained via fitting to experimental data (related to Figure 2).** The ODE system is given by Eq.(1-3). The values correspond to the mode of the posterior distribution. The lower and upper bounds correspond to the highest posterior density region, containing 95% of the posterior probability mass.
